# Supplementary material
Source: publisher figshare collection journal article supplement (https://acs.figshare.com/ndownloader/files/23107187)
Supplement: Supplementary file 1 [file 23107187]

## Supporting Information

### Carbazole-based Spiro[fluorene-9,9'-xanthene] as Efficient Hole-transporting Material for Perovskite Solar Cells

Do Yoon Lee,<sup>a,#</sup> Gangala Sivakumar,<sup>b,#</sup> Manju,<sup>b</sup> Rajneesh Misra,<sup>a\*</sup> Sang Il Seok<sup>a\*</sup>

<sup>a</sup>Department of chemistry and Energy Engineering, School of Energy and Chemical Engineering, Ulsan National Institute of Science and Technology (UNIST), Ulsan 44919, Republic of Korea

<sup>b</sup>Department of Chemistry, Indian Institute of Technology, Indore, India.

#: Equal contribution

E-mail: rajneeshmisra@iiti.ac.in; seoksi@unist.ac.kr

#### Details for measurement and device fabrication

**Electrochemical Measurement:** Cyclic voltammetry was carried out on a PC-controlled CHI 620C electrochemical analyzer (CH instruments). Cyclic voltammetry experiments were performed at a scan rate of 100 mVs<sup>-1</sup> using 0.1 M tetrabutylammoniumperchlorate (TBAP) as the supporting electrolyte in 1 mM solution of degassed dry dichloromethane. ~~Ag/Ag<sup>+</sup> was used as the reference electrode,~~ glassy carbon as the working electrode, and platinum wire as the counter electrode. The surface of working electrode was first polished with a 1 mm alumina slurry, and then with 0.3 mm an alumina slurry on a fine cloth. Next it was rinsed with deionized water and sonicated in water for 5 min. This polishing and ultrasonic treatment step were repeated twice.

**Device Fabrication:** The FTO (sahai VU glass) substrate was cleaned with detergent, purified water, and ultra-sonicated with ethyl alcohol in a water bath for 30 min. After solvent cleaning, the FTO substrates were cleaned in UV ozone chamber for 30 min. A bl-TiO<sub>2</sub> was deposited onto a cleaned FTO substrate by spray pyrolysis process using a 20mM titanium diisopropoxide bis(acetylacetonate) solution (Sigma-Aldrich) at 450 °C. Then, mp-TiO<sub>2</sub> films were deposited on bl-TiO<sub>2</sub> layer/FTO substrate using commercial TiO<sub>2</sub> paste (SC-HT040, ShareChem) by the spin coating method and were calcinated for 1 h at 500 °C in air atmosphere to remove the organic binder. The precursor solution for (FAPbI<sub>3</sub>)<sub>0.95</sub>(MAPbBr<sub>3</sub>)<sub>0.05</sub> perovskite was then spin-coated onto the mp-TiO<sub>2</sub>/bl-TiO<sub>2</sub>/FTO substrate by two consecutive steps at 1,000 r.p.m. for 5 s and then 5,000 r.p.m. for 20 s. During the second spin-coating (5,000 r.p.m.), 1 mL of ethyl ether was poured into the spinning precursor solution on the substrate. The precursor solution for (FAPbI<sub>3</sub>)<sub>0.95</sub>(MAPbBr<sub>3</sub>)<sub>0.05</sub> perovskite was prepared by dissolving 800 mg mL<sup>-1</sup> of FAPbI<sub>3</sub>, 30 mg mL<sup>-1</sup> of MAPbBr<sub>3</sub> and 40 mg mL<sup>-1</sup> of MACl in DMF/DMSO (8:2 v/v) mixed solvent. The intermediate phase substrate was placed on 150 °C hot plate for 10 min and 100 °C hot plate for 10 min. A p,p-Spiro OMeTAD solution was dissolved in chlorobenzene (CB) (91.4 mg mL<sup>-1</sup>) with 35.65 µL 4-tert-butylpyridine (tBP, 96%, Sigma-Aldrich), and 21.02 µL of lithium-bis(trifluoromethanesulfonyl) imide (Li-TFSi) solution in acetonitrile (ACN) (1.8 M), 9.14 µL of FK-209 solution in ACN (0.25 M). The Spiro-OMeTAD solution with additives was spin-coated onto the perovskite layer at 3000 r.p.m. for 30 s. Finally, Au metal electrode was deposited by thermal evaporation.

**Measurement of solar cells:** The current density-voltage (J-V) curves obtained using a solar simulator (Newport, Oriel Sol3A Class AAA) under illumination at AM 1.5 G with a source meter (Keithley 2420) at a size of  $100 \text{ mA cm}^{-2}$  and a calibrated Si-reference cell certified by NREL. The J-V curves of all devices were measured by masking the active area using a metal mask of  $0.094 \text{ cm}^2$  and measured along the forward scan direction from  $-0.2 \text{ V}$  to  $1.5 \text{ V}$  or the reverse scan direction from  $1.5 \text{ V}$  to  $-0.2 \text{ V}$ . The scan speed and step voltage were fixed at  $10 \text{ mV}$  and  $100 \text{ mVs}^{-1}$ , respectively. Measurement of external quantum efficiency (EQE) was performed using an IQE 200B system (ORIEL Instruments) under  $100 \text{ W}$  xenon lamp irradiation. The light intensity in the EQE was calibrated by a silicon reference detector.

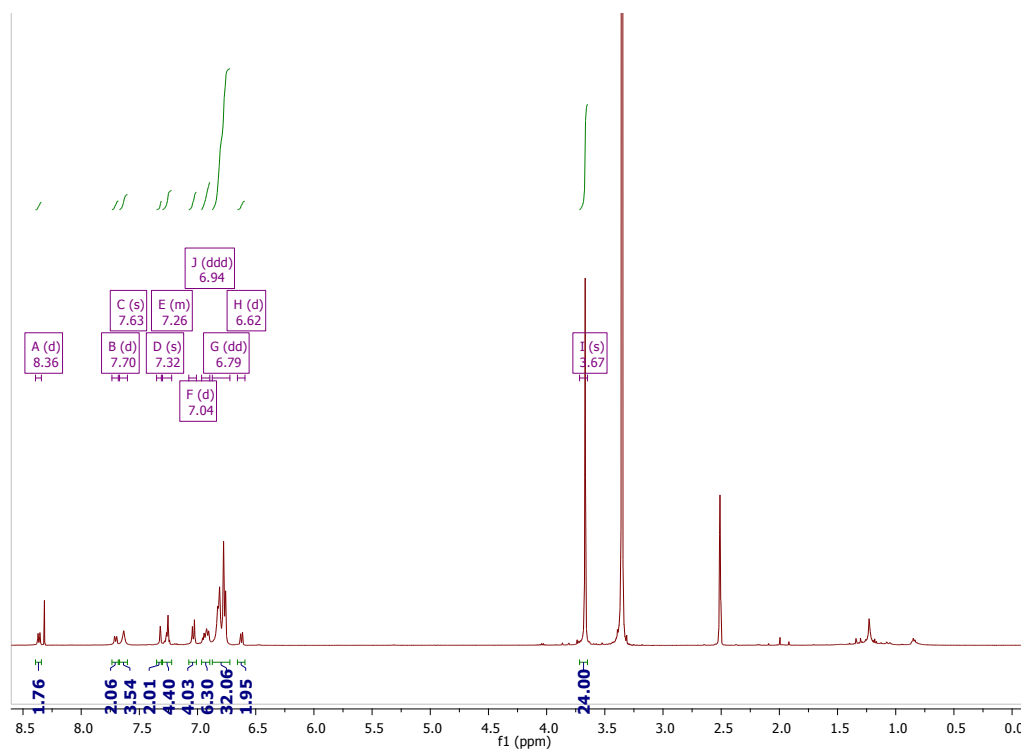

**Figure S1.**  $^1\text{H}$ -NMR of SFXDAnCBZ.

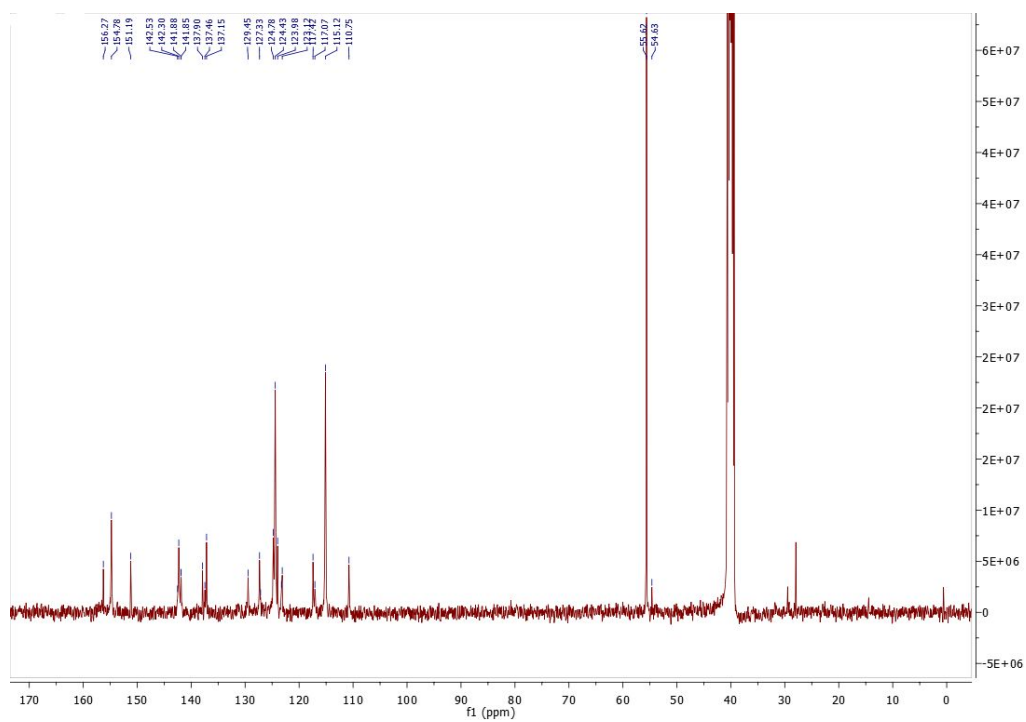

**Figure S2.** <sup>13</sup>C-NMR of SFXDAnCBZ.

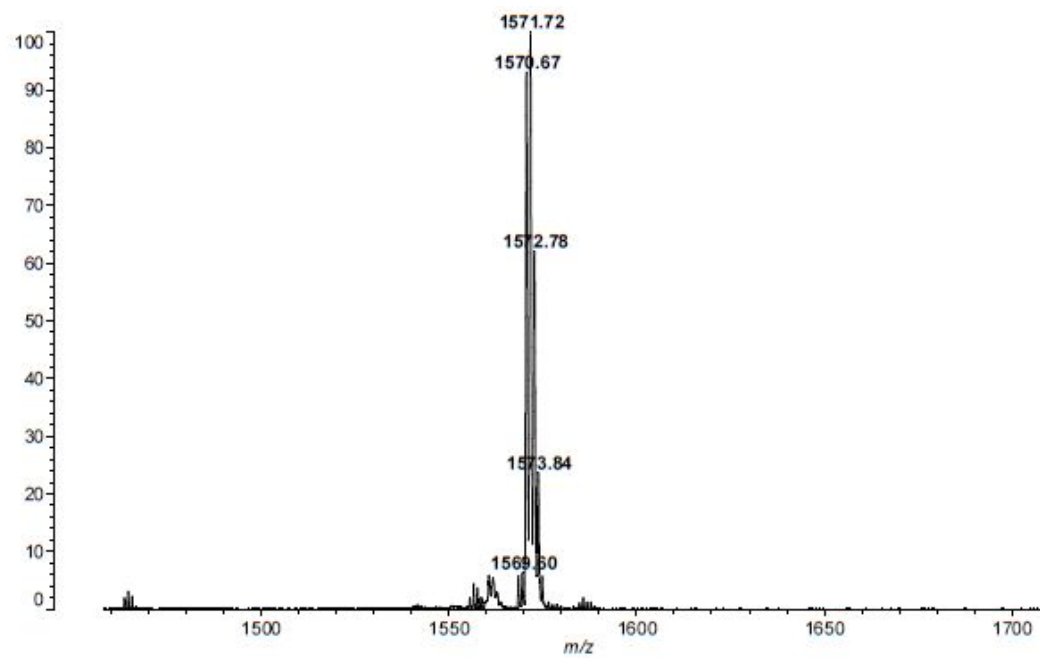

**Figure S3.** MALDI-TOF Mass spectrum of SFXDAnCBZ.

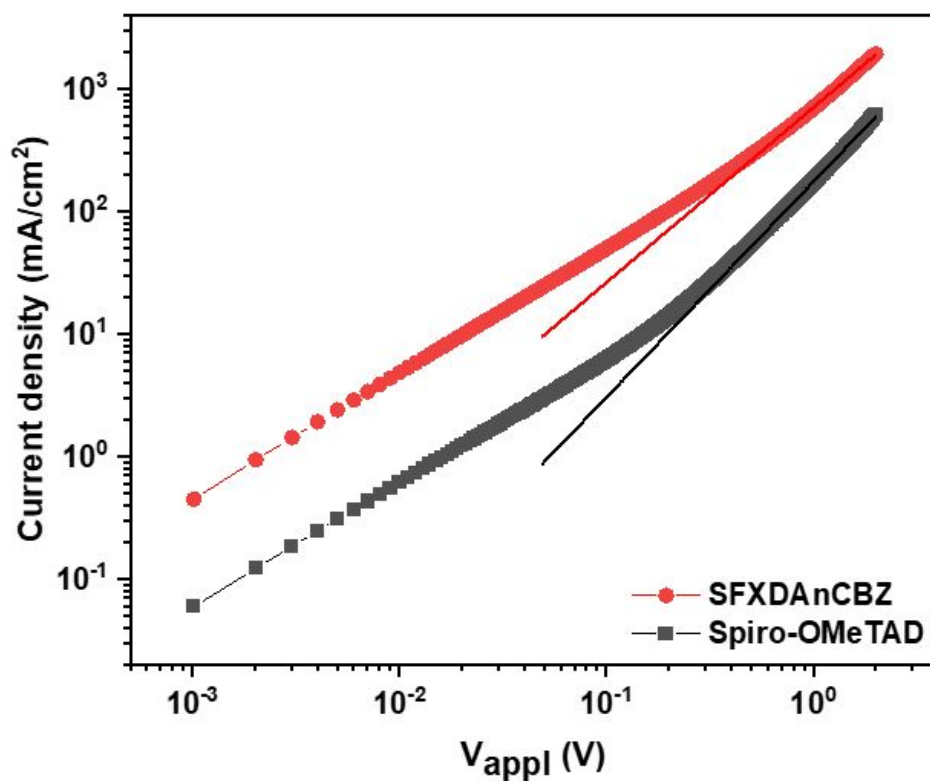

**Figure S4.** The space-charge-limited-current (SCLC) of hole-only devices with the configuration of FTO/PEDOT:PSS/Spiro-OMeTad or SFXDAnCBZ (with Li-bis(trifluoromethanesulfonyl)imide) (Li-TFSi) and 4-*tert*-butylpyridine (*t*BP) as additives)/Au.

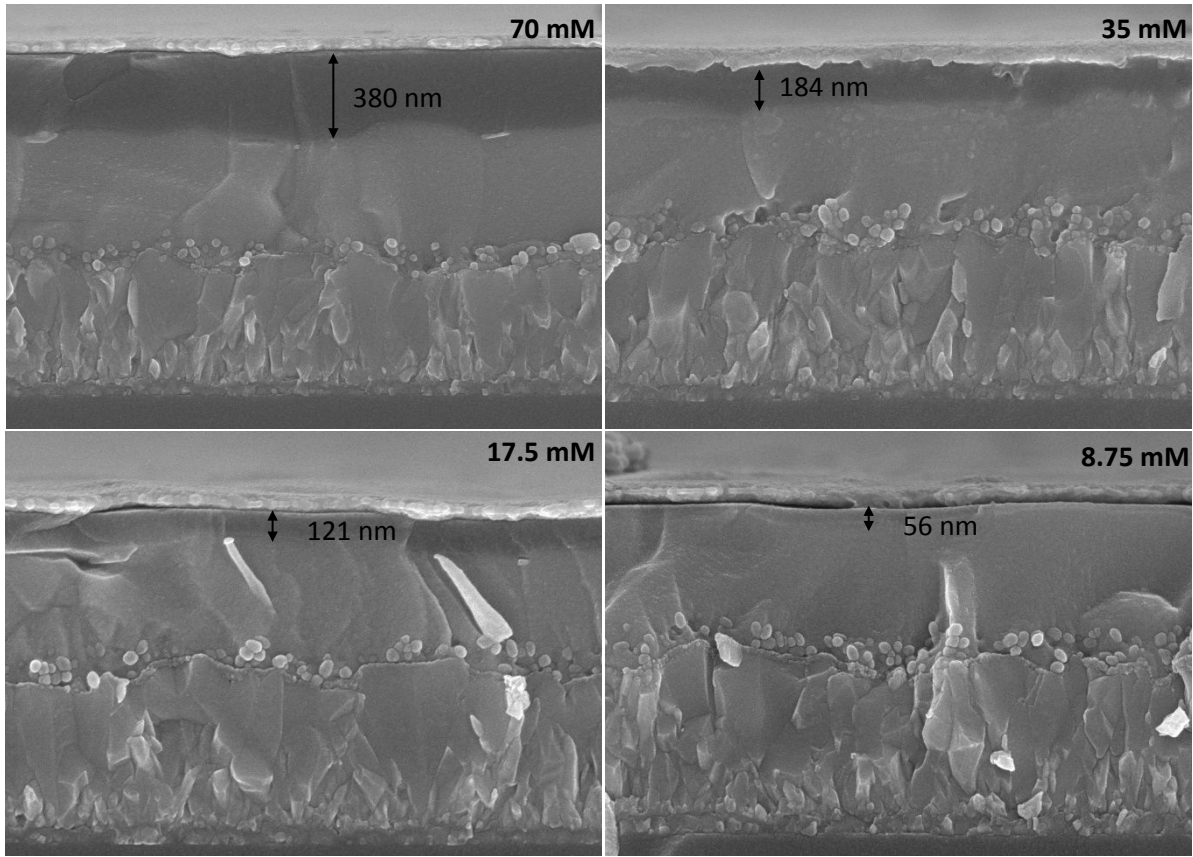

**Figure S5.** Cross-sectional scanning electron microscopy (SEM) images of perovskite solar cells fabricated by different concentration of SFXDAnCBZ.

**Table S1.** Summary of components obtained from the fitted plots of the corresponding spectra.

|              | $A_1$   | $\tau_1$ (ns) | $A_2$   | $\tau_2$ (ns) | $\tau_{avg}$ (ns) |
|--------------|---------|---------------|---------|---------------|-------------------|
| Perovskite   | 3943.6  | 318.049       | 9532.6  | 71.76         | 143.8             |
| Spiro-OMeTAD | 25514.7 | 22.01         | 4585.76 | 58.37         | 27.5              |
| SFXDAnOCBZ   | 4892.3  | 61.62         | 21664.8 | 24.17         | 31.0              |

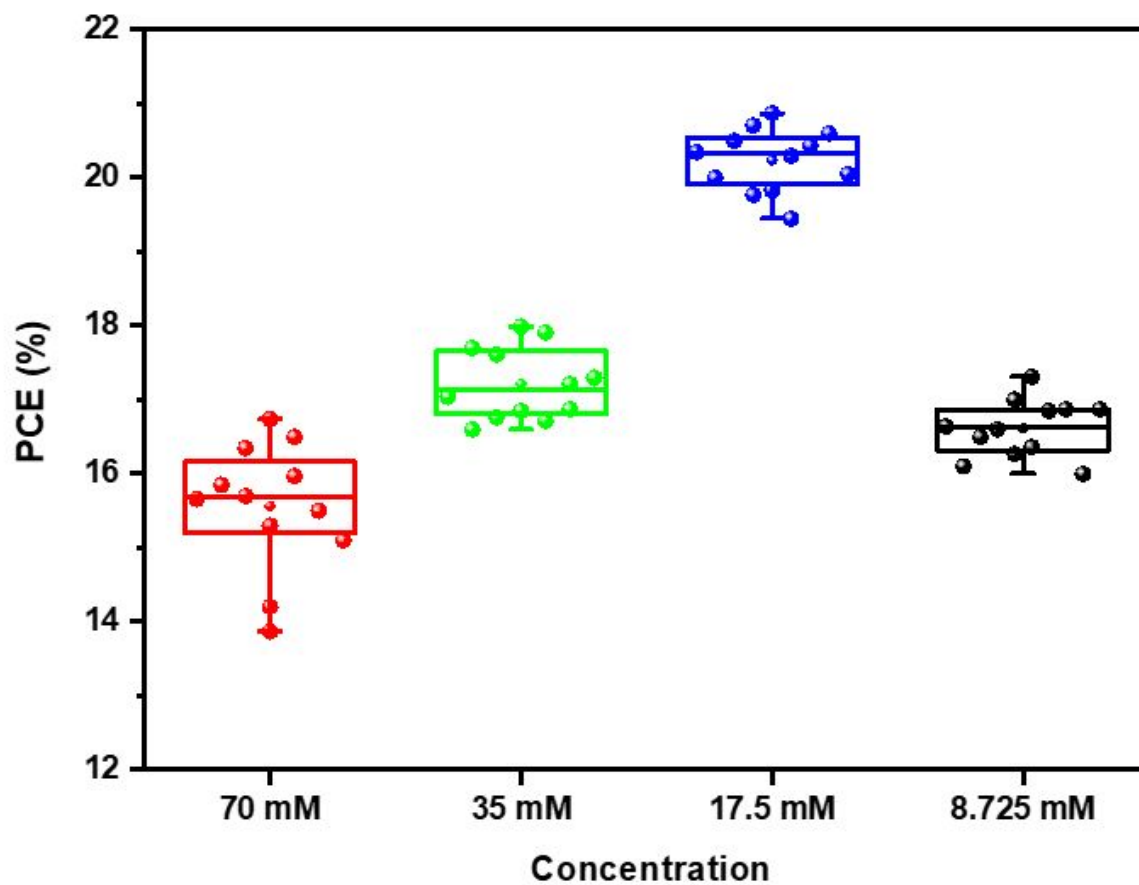

**Figure S6.** Power conversion efficiency (PCE) histogram of perovskite solar cells fabricated using different concentrations of SFXDAnCBZ.
